# Supplementary material
Source: PubMed Central journal article supplement (PMC5606357)
Supplement: INC663749-Supplemental_Table_2.pdf [file INC663749-Supplemental_Table_2.pdf]

(Supplementary) Table 2 Framework analysis

| Factors                                                       | Frequency of codes in transcripts* (*oft repeated more than once per respondent) | Framework theme        |
|---------------------------------------------------------------|----------------------------------------------------------------------------------|------------------------|
| 1a. Unit capacity                                             | 8                                                                                | CENTRE FACTORS         |
| 1b. Embedding trials (piloting etc)                           | 3                                                                                |                        |
| 1c. Unit culture (research active v less active)              | 15                                                                               |                        |
| 1d. Competing studies                                         | 7                                                                                |                        |
| 1e. Local R&D approval                                        | 4                                                                                |                        |
| 2a. Staffing                                                  | 23                                                                               | UNIT FACTORS           |
| 2b. Funding for staffing                                      | 4                                                                                |                        |
| 2c. Intra-ICU communication (research team v clinical team)   | 21                                                                               |                        |
| 2d. Intra-trial communication (research team v co-ordinators) | 2                                                                                |                        |
| 2e. Screening capacity/frequency                              | 10                                                                               |                        |
| 2f. Patient identification                                    | 8                                                                                | STUDY FACTORS          |
| 3a. Trial complexity                                          | 10                                                                               |                        |
| 3b. Consent timing (eligibility/out of hours)                 | 18                                                                               |                        |
| 3c. Screening issues                                          | 14                                                                               |                        |
| 3d. Co-enrolment                                              | 6                                                                                |                        |
| 3e. Ease of central trial contact                             | 2                                                                                |                        |
| 3f. Trial resources (e.g. drug supply)                        | 9                                                                                |                        |
| 3g. Recruitment targets                                       | 11                                                                               | RESOURCES              |
| 4a. Consultant PA time                                        | 6                                                                                |                        |
| 4b. Nursing workload ICU                                      | 15                                                                               |                        |
| 4c. Team initiatives to increase access                       | 10                                                                               |                        |
| 4e. Research nurse retention                                  | 17                                                                               |                        |
| 4f. Inclusion criteria restrictions                           | 5                                                                                |                        |
| 4g. Funding culture/practicalities                            | 10                                                                               |                        |
| 5a. Personal (consultant/team) buy-in                         | 3                                                                                | CLINICIAN FACTORS      |
| 5b. Concerns re: equipoise/uncertainty/consent                | 7                                                                                |                        |
| 5c. Protocol compliance                                       | 4                                                                                |                        |
| 6a. Burdens/scheduling                                        | 12                                                                               | PATIENT/FAMILY FACTORS |
| 6b. Randomization/placebo concerns/ preferences               | 9                                                                                |                        |
| 6c. Trial understanding                                       | 12                                                                               |                        |
| 6d. Information/communication (Patient/family)                | 20                                                                               |                        |
